# Supplementary material
Source: publisher figshare collection journal article supplement (https://frontiersin.figshare.com/ndownloader/files/29233965)
Supplement: Supplementary file [file 29233965]

## *Supplementary Material*

### **Supplementary Data**

**Supplementary Video 1. DT induced hair cell death affects adult swimming behaviors.** Injected wild-type fish (left panel) and Tg(*myo6b*:hDTR) with 10 ng of DT 3 days-post injection. Tg(*myo6b*:hDTR) display summersaulting and lateral looping when water is agitated.

## Supplementary Figures

**A**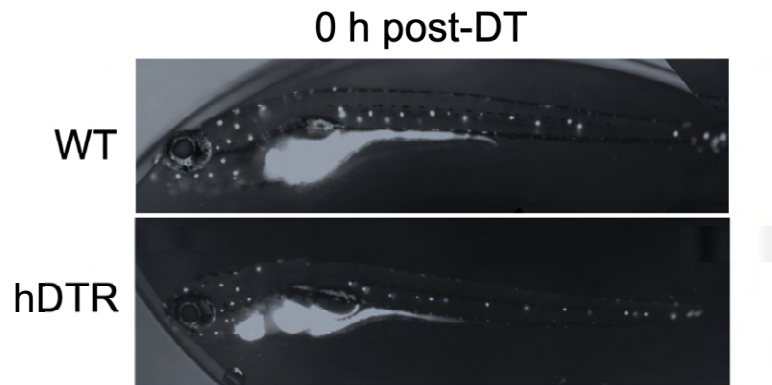**B**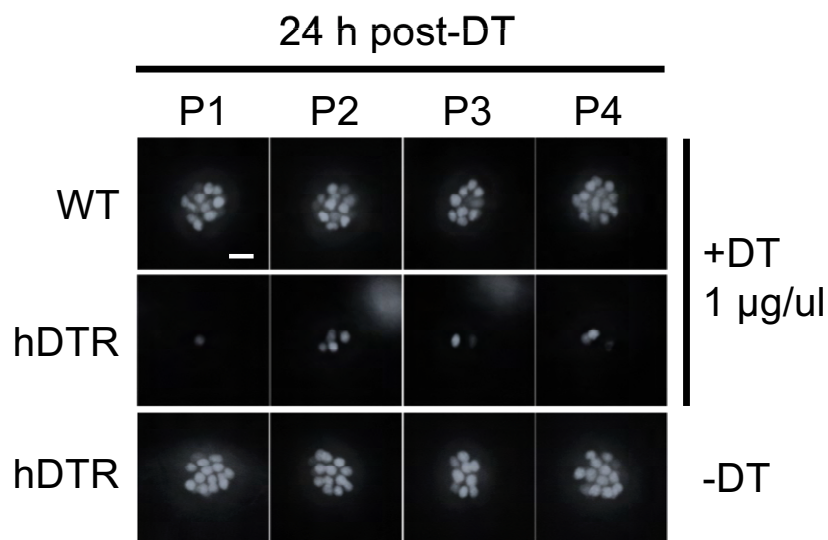**C**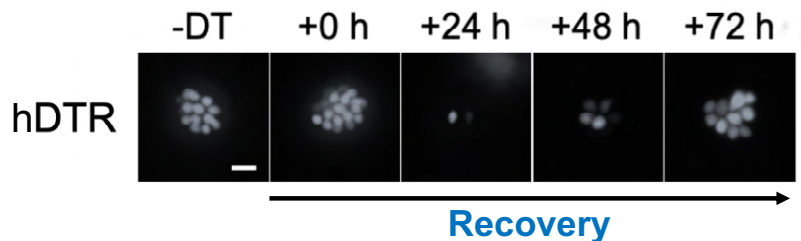

**Supplementary Figure 1. *Tg(myo6b:hDTR)* larval zebrafish show hair cell loss and regeneration in lateral line neuromasts after *in vivo* DT treatment.** Larvae were exposed to 1 µg/mL of DT for 6 h. Neuromast viability was monitored daily by YO-PRO-1 labelling 0 h to 72 h post-DT incubation. The 1 µg/mL concentration and the 6 h duration of DT exposure was selected based on dose-dependent work in Figure 2. **(A)** Wild-type (WT) controls and *Tg(myo6b:hDTR)* larvae (hDTR) 0 h post-DT. **(B)** Neuromasts 24 h post-DT in WT and *Tg(myo6b:hDTR)* larvae. **(C)** Regeneration time-course showing P3 neuromast of *Tg(myo6b:hDTR)* larvae treated with DT. Scale bar 100 µm.

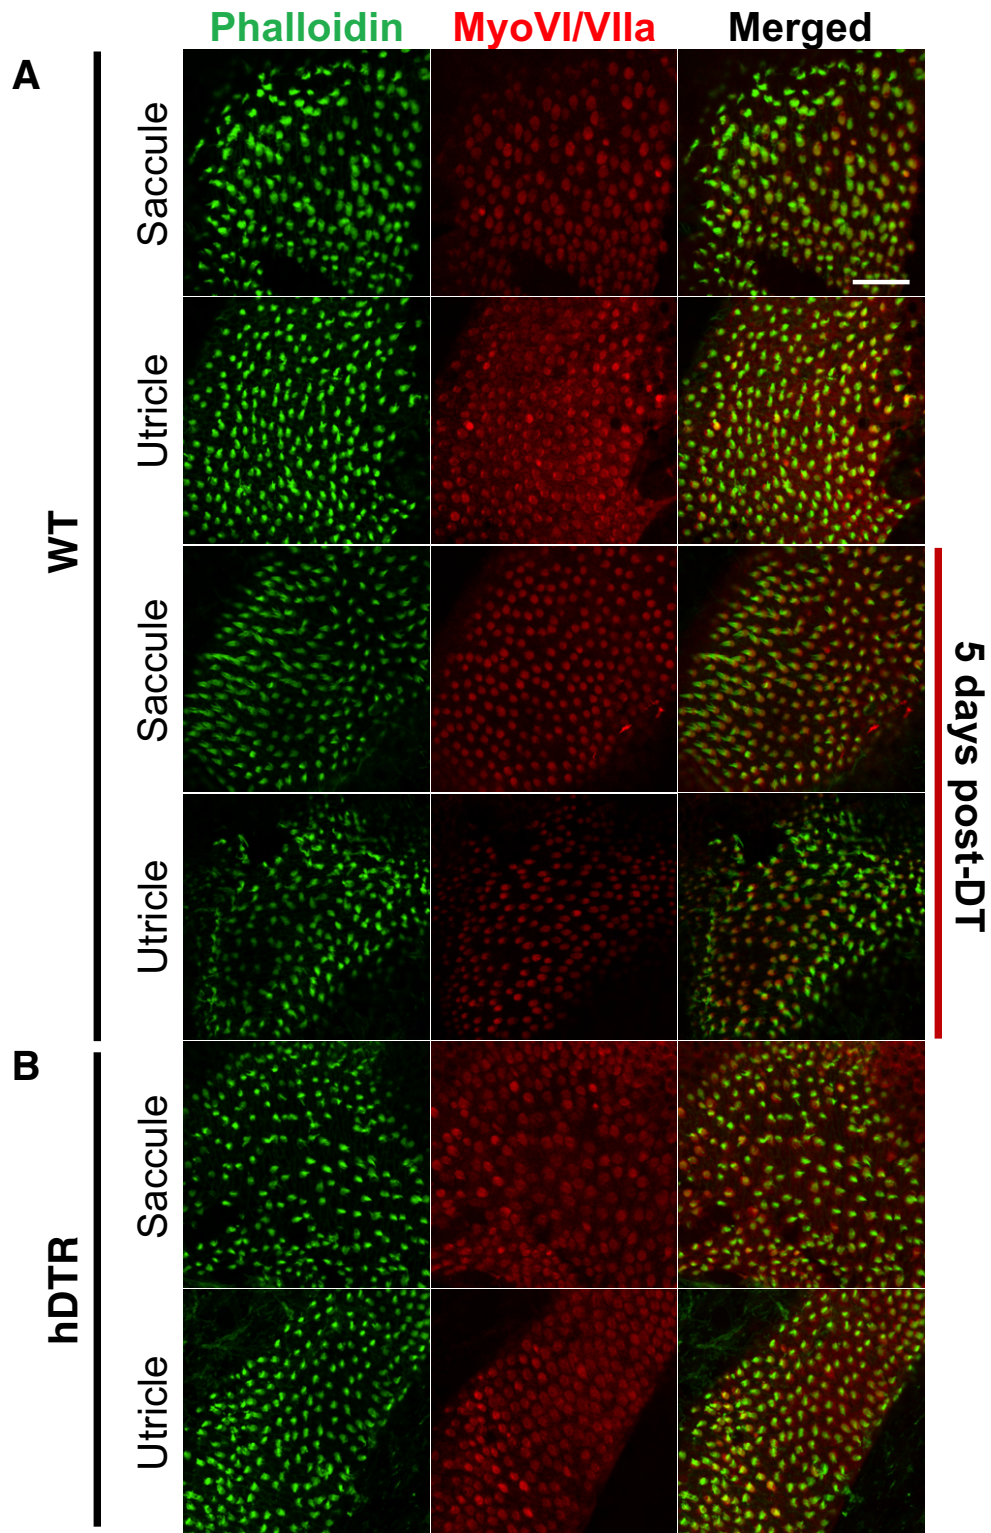

**Supplementary Figure 2. *Tg(myo6b:hDTR)* sensory epithelia.** (A) Untreated and treated sacculi and utricles from wild-type fish (WT). Sacculi and utricles were isolated from treated wild-type fish 5 days post-DT. (B) Untreated sacculi and utricles from *Tg(myo6b:hDTR)* fish (hDTR). Close examination of hair cells with phalloidin (green channel) and hair cell bodies with anti-myosin VI/VIIa (red channel). Scale bar 20  $\mu$ m.
